# Supplementary material
Source: publisher figshare collection journal article supplement (https://tandf.figshare.com/ndownloader/files/21806880)
Supplement: Supplementary file 1 [file 21806880]

# Supplementary Material

Cadmium and chromium determination in herbal tinctures employing direct analysis by graphite furnace atomic absorption spectrometry (GF AAS)

Agatha Merilin de Oliveira Lopesa, Paula Rocha Chellinib and Rafael Arromba de Sousa a*

aDepartment of Chemistry, Universidade Federal de Juiz de Fora, Juiz de Fora, Brazil; bPharmacy Faculty, Universidade Federal de Juiz de Fora, Juiz de Fora, Brazil

Department of Chemistry, Universidade Federal de Juiz de Fora, 36036-900, Juiz de Fora, MG, Brazil. E-mail: rafael.arromba@ufjf.edu.br

**Table S1**. Instrumental parameters recommended by the manufacturer for the determination of cadmium and chromium by GF AAS

| **Parameters** | **Cadmium** | **Chromium** |
| --- | --- | --- |
| Pyrolysis Temperature (°C) | 300ª, 600b | 1200 |
| Atomization Temperature (°C) | 900ª, 1000b | 2500 |
| Chemical modifier | Pd or Mg(NO3)2 | Mg(NO3)2 |

a without the chemical modifier b with the chemical modifier

**Table S2.** Analysisof linear regression of the external calibration model for the determination of cadmium and chromium by direct analysis by GF AAS

| **Statistical test** | **Cadmium** | **Chromium** |
| --- | --- | --- |
| Shapiro-Wilk Test (Wtab = 0.859) | Wcalc = 1.024 | Wcalc = 0.965 |
| Cochran Test (Ctab = 0.7808) | Ccalc = 0.6504 | Ccalc = 0.4874 |
| Lack of adjust (Ffaj-tab = 4.53) | Ffaj-calc = 3.21 | Ffaj-calc = 0.51 |
| Regression (Freg-tab = 1.04) | Freg-calc = 1347 | Freg-calc = 497 |
| R² | 0.9940 | 0.9909 |


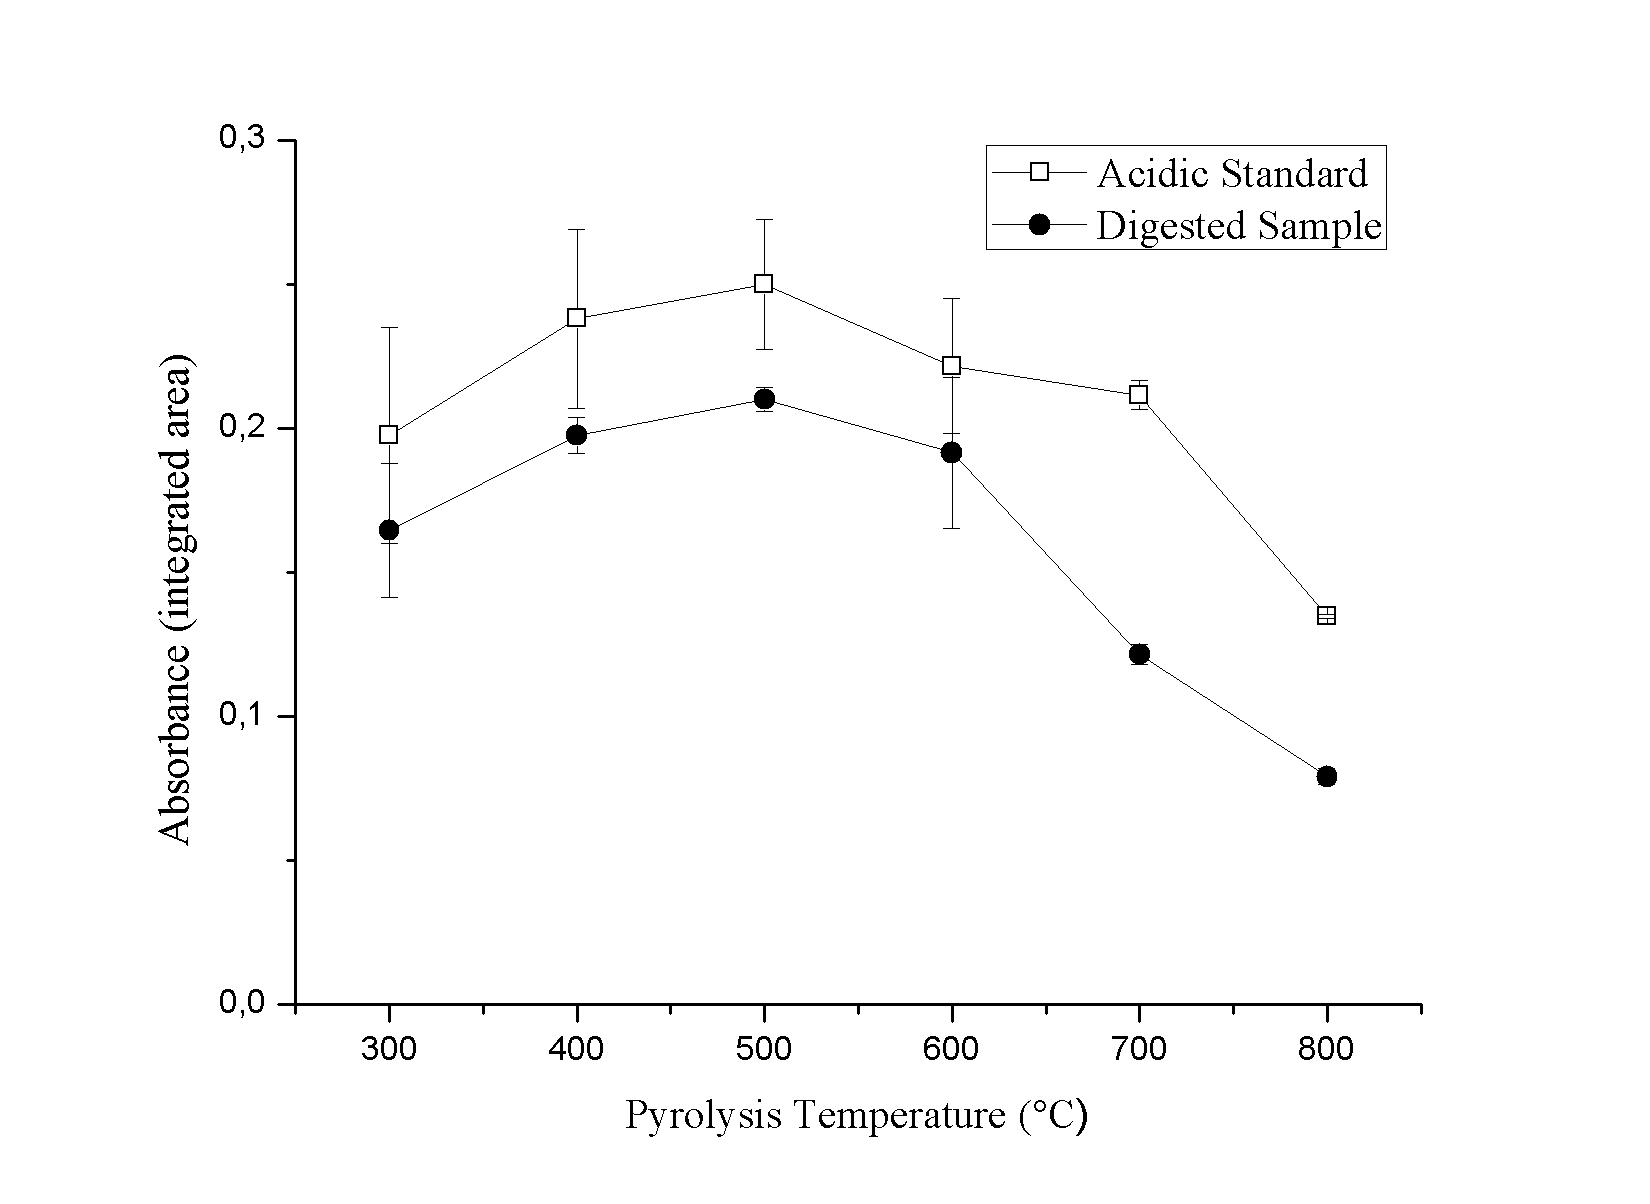


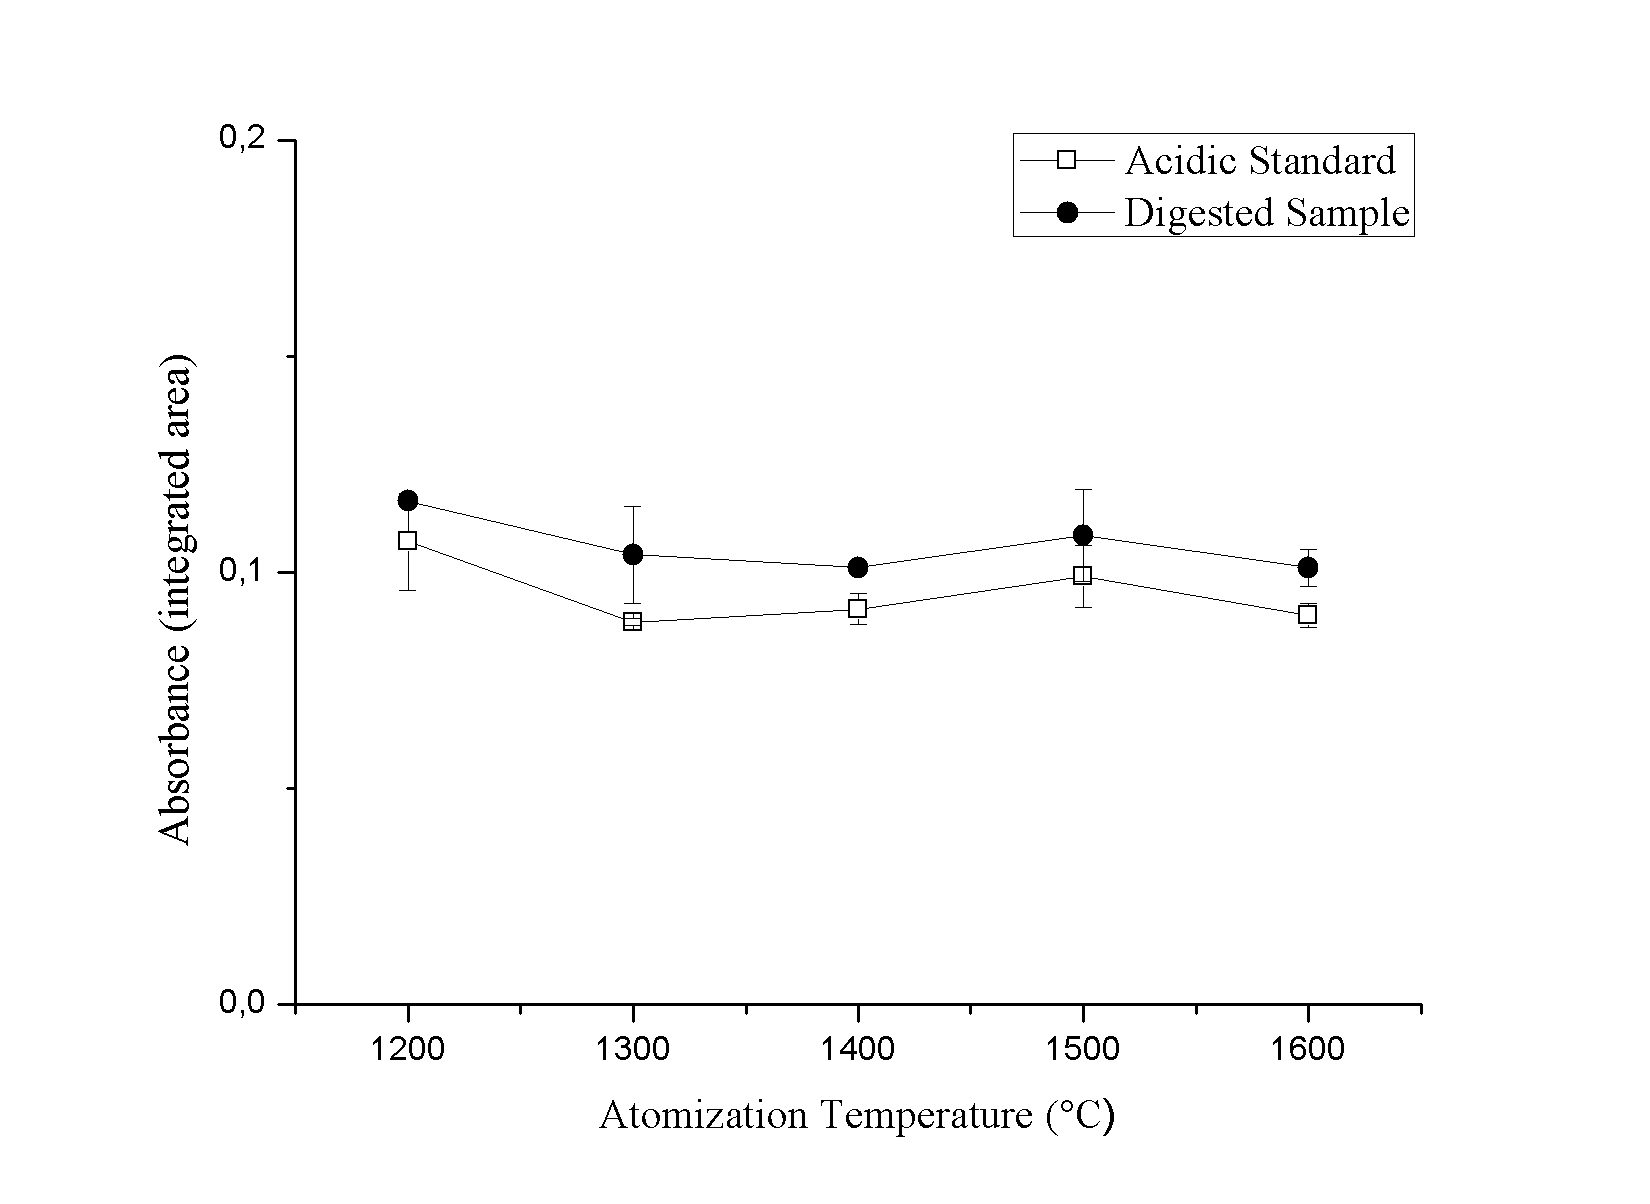


Figure S1. Pyrolysis and atomization temperature curves for Cd. Acidic standard and digested sample. Fixed values to the optimization, atomization temperature: 900°C and pyrolysis temperature: 500°C.


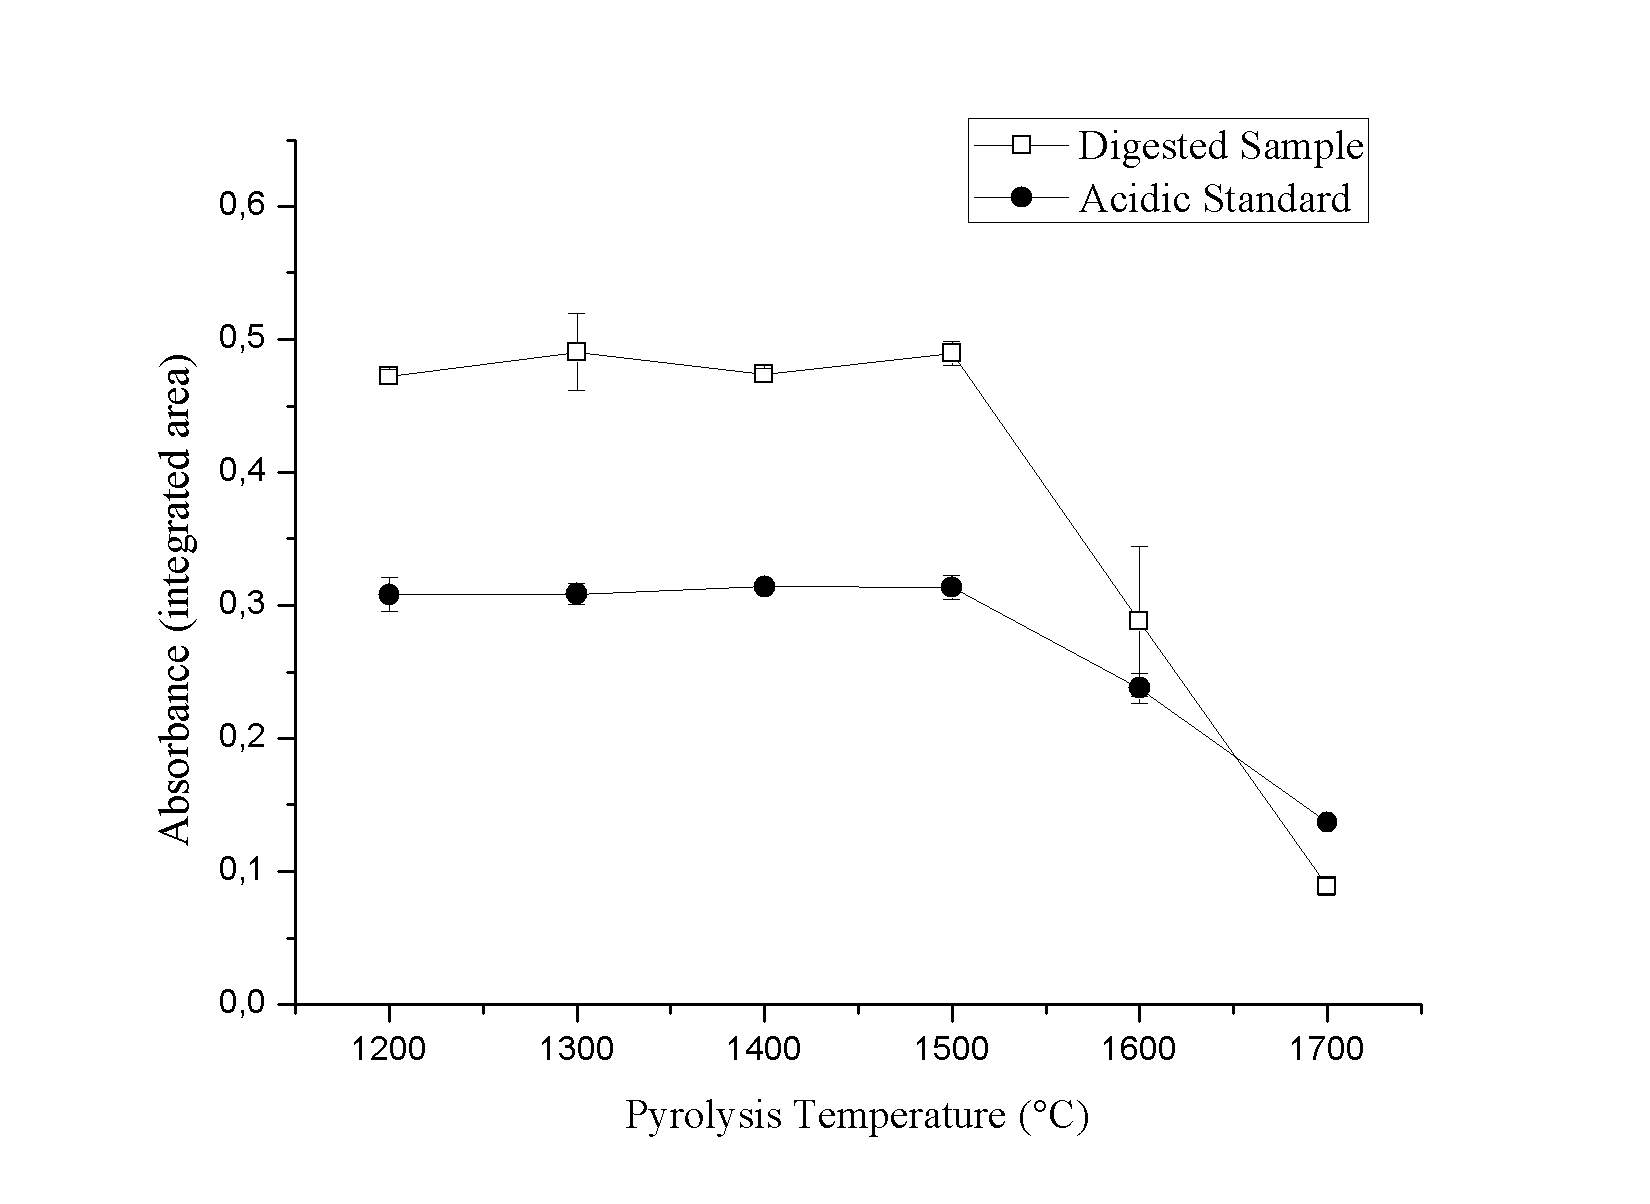


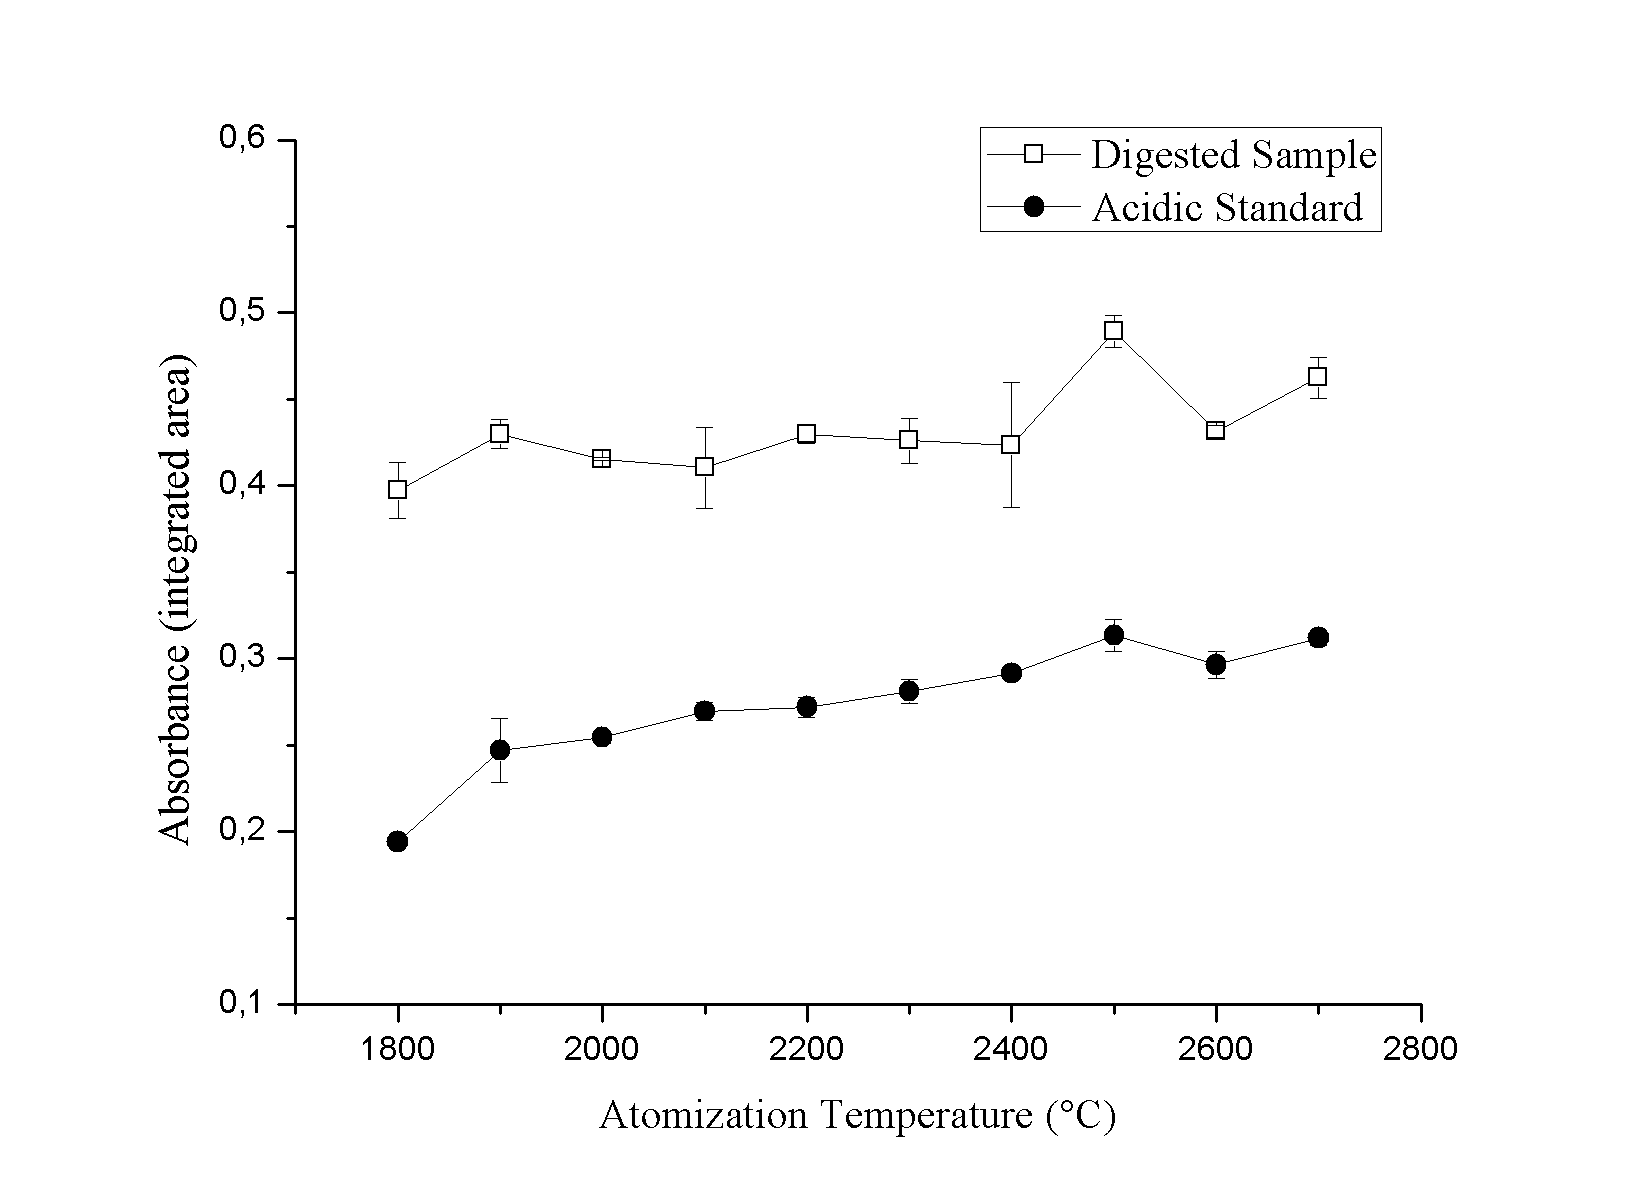


Figure S2. Pyrolysis and atomization temperature curves for Cr. Acidic standard and digested sample. Fixed values to the optimization, atomization temperature: 2500°C and pyrolysis temperature: 1500 °C.
